# Supplementary material
Source: PubMed Central journal article supplement (PMC7344177)
Supplement: NIHMS1542502-supplement-1.pdf [file NIHMS1542502-supplement-1.pdf]

## Supplementary Material

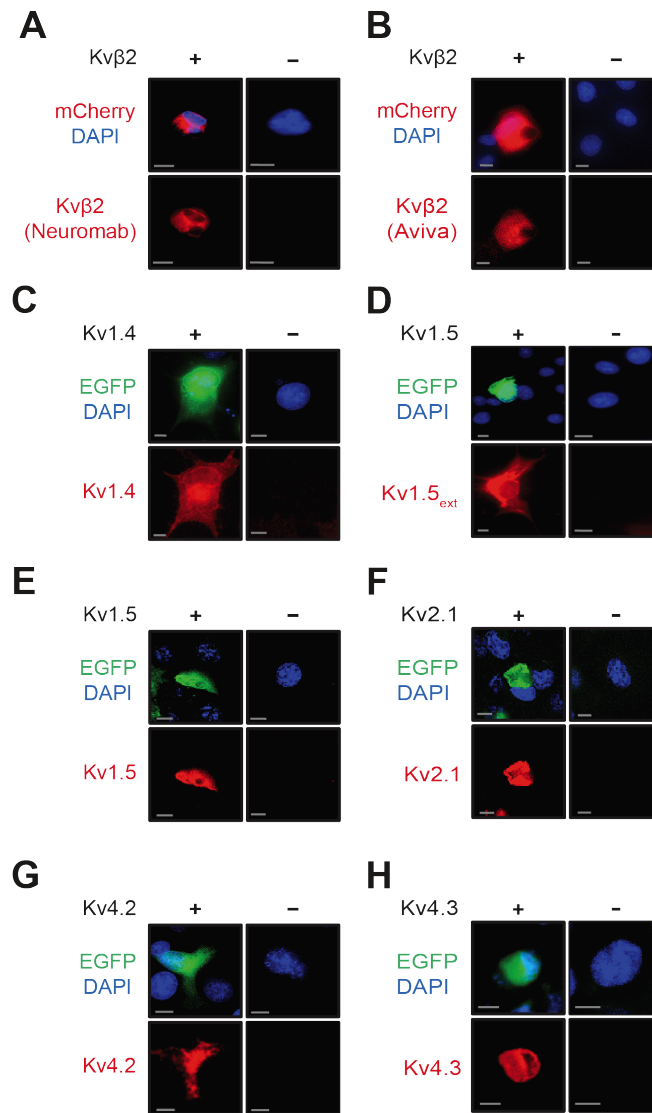

**Figure S1: Protein recognition by anti-Kv primary antibodies used in immunofluorescence and PLA experiments.** Widefield fluorescence images of COS-7 cells expressing (+) Kv $\beta$ 2 (**A,B**; *Kcnab2*; NM\_001252656.1), Kv1.4 (**C**; *Kcna4*; NM\_0211275.4), Kv1.5 (**D,E**; *Kcna5*; NM\_145983.2), Kv2.1 (**F**; *Kcnb1*; NM\_008420.4), Kv4.2 (**G**; *Kcnd2*; NM\_019697.4), and Kv4.3 (**H**; *Kcnd3*; NM\_019931.1) labeled using primary antibodies as indicated and described in Methods. Images of untransfected (-) COS-7 cells that were negative for mCherry or EGFP

reporters and were labeled for respective Kv proteins using the identical procedure are also shown for each. Scale bars represent 10  $\mu\text{m}$ .

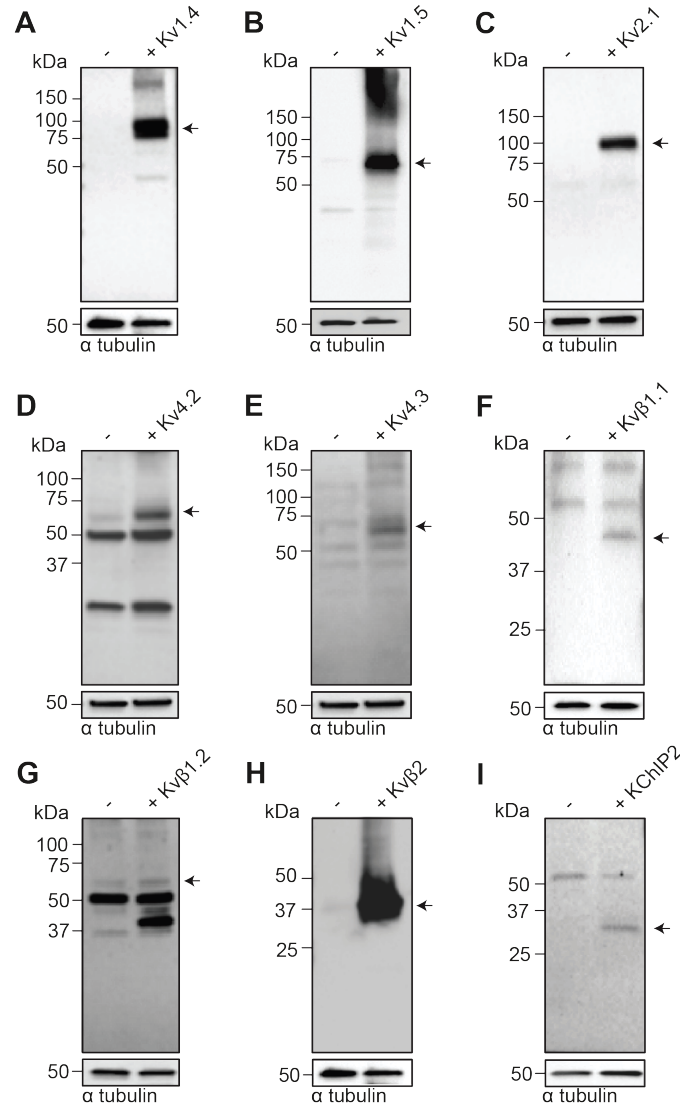

**Figure S2: Immunoreactivity of anti-Kv antibodies used in Western blot and co-immunoprecipitation experiments.** Western blots showing immunoreactive bands for Kv1.4 (A), Kv1.5 (B), Kv2.1 (C), Kv4.2 (D), Kv4.3 (E), Kv $\beta$ 1.1 (F), Kv $\beta$ 1.2 (G), Kv $\beta$ 2 (H), and KCHIP2 (I) in untransfected COS-7 cells (-) and COS-7 cells transfected with expression vectors for target genes (*Kcna4*, NM\_0211275.4; *Kcna5*, NM\_145983.2; *Kcnb1*, NM\_008420.4; *Kcnd2*, NM\_019697.4; *Kcnd3*, NM\_019931.1; *Kcnab1.1*, NM\_010597.4; *Kcnab1.2*, AF131935; *Kcnab2*, NM\_001252656.1; KCHIP2, NM\_145703.2). Arrows depict bands at expected molecular weight for respective protein of interest.

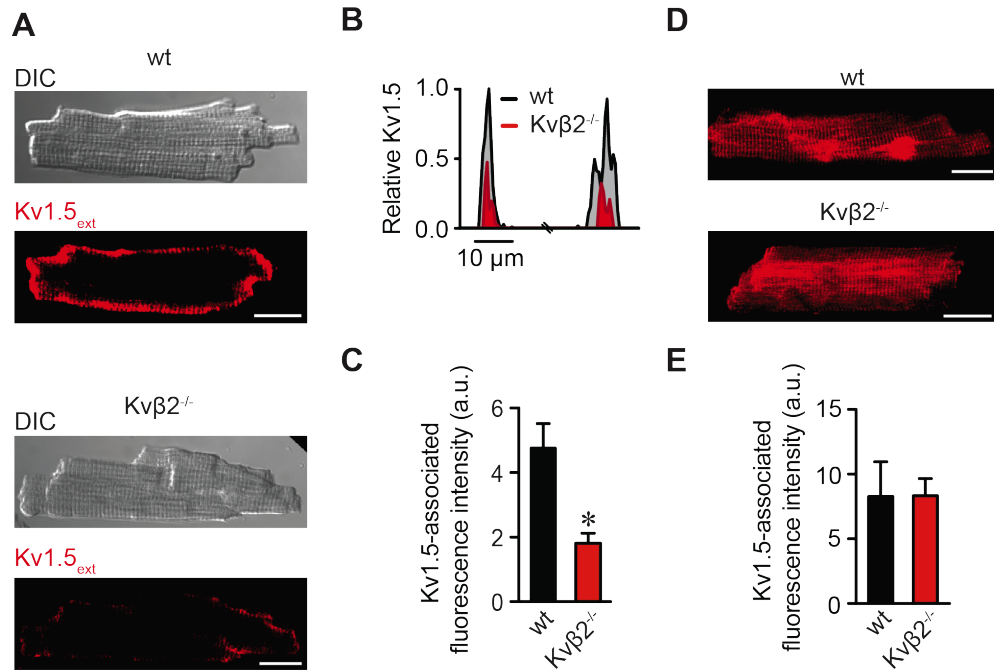

**Figure S3: Reduced sarcolemmal abundance of Kv1.5 in cardiac myocytes from Kvβ2<sup>-/-</sup> mice.** (A) DIC and confocal images showing membrane-associated Kv1.5 (Kv1.5<sub>ext</sub>, red) in isolated non-permeabilized ventricular myocytes from wt and Kvβ2<sup>-/-</sup> animals. Scale bars = 20 μm. (B,C) Line intensity plots showing relative Kv1.5<sub>ext</sub>-associated fluorescence levels for myocytes shown in panel A (B), and bar plot showing membrane-associated Kv1.5-associated fluorescence intensity (C; arbitrary units) in myocytes from wt and Kvβ2<sup>-/-</sup> animals (n = 9 cells from 3 animals for each). (D,E) Confocal images showing total Kv1.5 (D), and bar plot summarizing mean Kv1.5-associated fluorescence intensities in isolated permeabilized ventricular myocytes from wt and Kvβ2<sup>-/-</sup> animals (n = 7-8 cells from 3 mice each).

**Table S1: Kv current and action potential properties in cardiac myocytes from wild type and Kv $\beta$ 2<sup>-/-</sup> animals.**

|                                             | WT (n = 18)        | Kv $\beta$ 2 <sup>-/-</sup> (n = 15) |
|---------------------------------------------|--------------------|--------------------------------------|
| <b>Cell capacitance (pF)</b>                | 103.5 $\pm$ 5.3    | 93.5 $\pm$ 4.4                       |
| <b><i>I</i><sub>to</sub></b>                |                    |                                      |
| <b><i>pA/pF</i></b>                         | 27.6 $\pm$ 3.5     | 15.8 $\pm$ 2.0*                      |
| <b><math>\tau</math> (msec)</b>             | 59.3 $\pm$ 1.5     | 63.8 $\pm$ 2.7                       |
| <b><i>I</i><sub>K,slow1</sub></b>           |                    |                                      |
| <b><i>pA/pF</i></b>                         | 15.6 $\pm$ 1.6     | 12.3 $\pm$ 2.3*                      |
| <b><math>\tau</math> (msec)</b>             | 418.6 $\pm$ 36.2   | 467.3 $\pm$ 27.3                     |
| <b><i>I</i><sub>K,slow2</sub></b>           |                    |                                      |
| <b><i>pA/pF</i></b>                         | 20.6 $\pm$ 1.5     | 16.3 $\pm$ 2.1*                      |
| <b><math>\tau</math> (msec)</b>             | 2474.8 $\pm$ 179.1 | 2923 $\pm$ 274.7                     |
| <b><i>I</i><sub>ss</sub></b>                |                    |                                      |
| <b><i>pA/pF</i></b>                         | 8.7 $\pm$ 1.4      | 8.1 $\pm$ 1.0                        |
| <b>RMP (mV)</b>                             | -82.8 $\pm$ 1.2    | -84.5 $\pm$ 0.6                      |
| <b><i>dV/dT</i><sub>max</sub> (mV/msec)</b> | 153.1 $\pm$ 11.0   | 142.0 $\pm$ 9.3                      |
| <b>AP amplitude (mV)</b>                    | 113.6 $\pm$ 1.8    | 112.7 $\pm$ 1.6                      |
| <b>APD<sub>20</sub> (msec)</b>              | 1.87 $\pm$ 0.06    | 2.17 $\pm$ 0.08*                     |
| <b>APD<sub>50</sub> (msec)</b>              | 3.77 $\pm$ 0.21    | 4.68 $\pm$ 0.34*                     |
| <b>APD<sub>90</sub> (msec)</b>              | 16.22 $\pm$ 1.54   | 24.31 $\pm$ 2.52*                    |

Data are mean  $\pm$  SEM. \*P<0.05.

**Table S2: Comparison of electrocardiographic parameters in wild type and Kv $\beta$ <sup>-/-</sup> mice.**

| <b>Measurement</b>  | <b>Wild type (N = 6)</b> | <b>Kv<math>\beta</math><sup>-/-</sup> (N = 10)</b> |
|---------------------|--------------------------|----------------------------------------------------|
| RR interval (msec)  | 134.5 $\pm$ 3.5          | 140.1 $\pm$ 2.0                                    |
| Heart rate (bpm)    | 448 $\pm$ 11             | 429 $\pm$ 6                                        |
| P duration (msec)   | 8.5 $\pm$ 0.5            | 11.4 $\pm$ 0.7*                                    |
| PR interval (msec)  | 43.5 $\pm$ 1.5           | 39.3 $\pm$ 2.2                                     |
| QRS interval (msec) | 8.4 $\pm$ 0.3            | 11.7 $\pm$ 0.5*                                    |
| QT interval (msec)  | 21.7 $\pm$ 0.3           | 26.0 $\pm$ 0.6*                                    |
| QTc (msec)          | 59.3 $\pm$ 1.2           | 69.5 $\pm$ 1.5*                                    |
| JT interval (msec)  | 13.3 $\pm$ 0.4           | 14.3 $\pm$ 0.5                                     |

Data are mean  $\pm$  SEM. \*P<0.05.

**Table S3: Comparison of echocardiographic parameters in wild type and  $Kv\beta 2^{-/-}$  mice.**

| <b>Measurement</b>        | <b>Wild type (N = 10)</b> | <b><math>Kv\beta 2^{-/-}</math> (N = 11)</b> |
|---------------------------|---------------------------|----------------------------------------------|
| Age (wks)                 | 21.9 ± 0.1                | 22.1 ± 0.2                                   |
| Weight (g)                | 28.8 ± 1.2                | 27.5 ± 0.7                                   |
| HR (BPM)                  | 467 ± 14                  | 463 ± 10                                     |
| <b>Endocardial values</b> |                           |                                              |
| EDV (μl)                  | 37.2 ± 2.6                | 36.0 ± 2.2                                   |
| ESV (μl)                  | 11.0 ± 1.5                | 11.8 ± 1.4                                   |
| SV (μl)                   | 26.2 ± 1.5                | 24.2 ± 1.2                                   |
| EF (%; M)                 | 80 ± 3                    | 72 ± 2*                                      |
| EF (%; B)                 | 71 ± 2                    | 68 ± 2                                       |
| FS (%)                    | 49 ± 3                    | 41 ± 2*                                      |
| CO (ml/min)               | 12 ± 0.7                  | 11 ± 0.5                                     |
| E/A                       | 1.59 ± 0.08               | 1.53 ± 0.09                                  |
| <b>Chamber diameter</b>   |                           |                                              |
| LVIDd (mm)                | 3.5 ± 0.1                 | 3.5 ± 0.1                                    |
| LVIDs (mm)                | 1.8 ± 0.1                 | 2.0 ± 0.2                                    |
| <b>Wall Thickness</b>     |                           |                                              |
| LVPWd (mm)                | 0.8 ± 0.1                 | 0.8 ± 0.1                                    |
| LVPWs (mm)                | 1.3 ± 0.1                 | 1.1 ± 0.1*                                   |
| LVAWd (mm)                | 0.8 ± 0.1                 | 0.7 ± 0.1                                    |
| LVAWs (mm)                | 1.1 ± 0.1                 | 1.0 ± 0.1                                    |
| RWT                       | 0.46 ± 0.02               | 0.43 ± 0.01                                  |

Data are mean ± SEM. \*P<0.05. Abbreviations: HR, heart rate; BPM, beats per minute; EDV, end diastolic volume; ESV, end systolic volume; SV, stroke volume; EF, ejection fraction; FS, fractional shortening; CO, cardiac output; LVIDd, left ventricular inner diameter at diastole; LVIDs, left ventricular inner diameter at systole; LVPWd, left ventricular posterior wall at diastole; LVPWs, left ventricular posterior wall at systole; LVAWd, left ventricular anterior wall at diastole; LVAWs, left ventricular anterior wall at systole; RWT, relative wall thickness.
